# Supplementary material
Source: PubMed Central journal article supplement (PMC6700752)
Supplement: NIHMS1046395-supplement-dupporting_Information.pdf [file NIHMS1046395-supplement-dupporting_Information.pdf]

## Supporting Information

### Dissecting the Innate Immune Recognition of Opioid Inactive

### Isomer (+)-Naltrexone Derived Toll-like Receptor 4 (TLR4)

### Antagonists

Xiaozheng Zhang<sup>1, 2</sup>, Fengchao Cui<sup>\*:3</sup>, Hongqian Chen<sup>1</sup>, Tianshu Zhang<sup>1</sup>, Kecheng Yang<sup>3</sup>, Yibo Wang<sup>1</sup>, Zhenyan Jiang<sup>4</sup>, Kenner C. Rice<sup>5</sup>, Linda R. Watkins<sup>6</sup>, Mark R. Hutchinson<sup>7</sup>, Yunqi Li<sup>3</sup>, Yinghua Peng<sup>8</sup>, Xiaohui Wang<sup>\*:1</sup>

<sup>1</sup>Laboratory of Chemical Biology, Changchun Institute of Applied Chemistry, Chinese Academy of Sciences, Changchun, Jilin, 130022, China; University of Chinese Academy of Sciences, Beijing, 100039, China

<sup>2</sup>State Key Laboratory of Natural Medicines, China Pharmaceutical University, Nanjing, 210009, China

<sup>3</sup>Key Laboratory of Synthetic Rubber, Changchun Institute of Applied Chemistry, Chinese Academy of Sciences, Changchun, Jilin, 130022, China

<sup>4</sup>School of Pharmaceutical Sciences, Jilin University, Changchun, Jilin, 130021, China

<sup>5</sup>Drug Design and Synthesis Section, National Institute on Drug Abuse and National Institute on Alcohol Abuse and Alcoholism, National Institutes of Health, Rockville, MD 20892, USA

<sup>6</sup>Department of Psychology and Neuroscience, and the Center for Neuroscience, University of Colorado at Boulder, Boulder, CO 80309, USA

<sup>7</sup>Discipline of Physiology, Adelaide Medical School, University of Adelaide, South Australia, Australia; ARC Centre of Excellence for Nanoscale Biophotonics, University of Adelaide, South Australia, 5000, Australia.

<sup>8</sup>State Key Laboratory for Molecular Biology of Special Economic Animals, Institute of Special Wild Economic Animals and Plants, Chinese Academy of Agricultural Sciences, Changchun, Jilin 130112, China

\* Corresponding author

E-mail: [fccui@ciac.ac.cn](mailto:fccui@ciac.ac.cn)

E-mail: [xiaohui.wang@ciac.ac.cn](mailto:xiaohui.wang@ciac.ac.cn)

**Table S1.** The decomposition of per-residue binding free energies (kcal/mol) of TLR4 antagonists binding to MD-2

| Residue | Compound   |            |            |            |            |
|---------|------------|------------|------------|------------|------------|
|         | 1          | 2          | 3          | 4          | 5          |
| Ser48   | -1.5 (0.9) |            |            |            |            |
| Ile52   | -1.4 (0.3) | -2.3 (0.5) | -1.5 (0.3) |            | -1.6 (0.4) |
| Val61   | -1.6 (0.4) | -1.2 (0.3) |            |            | -1.3 (0.3) |
| Phe76   | -2.1 (0.4) | -1.7 (0.4) | -2.4 (0.3) | -2.5 (0.3) | -3.0 (0.4) |
| Leu78   |            | -1.4 (0.3) | -1.0 (0.3) |            |            |
| Glu92   | -1.5 (0.4) | -1.5 (0.7) | -2.2 (1.0) | -1.5 (0.5) |            |
| Leu94   |            |            | -2.2 (0.7) | -2.2 (0.6) | -0.9 (0.2) |
| Pro118  |            |            |            | -2.0 (0.4) |            |
| Phe119  | -2.2 (0.4) | -1.5 (0.4) | -2.6 (0.5) | -3.8 (0.5) | -2.3 (0.5) |
| Phe121  | -1.5 (0.5) | -1.1 (0.3) | -2.9 (0.6) |            |            |
| Phe147  |            |            |            |            | -2.0 (0.7) |
| Cys148  |            |            |            |            | -1.3 (0.3) |
| Leu149  | -0.7 (0.2) |            |            |            | -2.1 (0.5) |
| Phe151  | -2.7 (0.5) | -2.2 (0.5) | -2.4 (0.5) |            | -0.9 (0.4) |

Numbers in parentheses present standard error

**Table S2.** Hydrogen bonding interactions of key residues Arg90 and Glu122 and the corresponding probabilities in state I, II and III over the MD simulations

| System   | state    |          |      |      |      |
|----------|----------|----------|------|------|------|
|          | Donor    | Acceptor | I    | II   | III  |
| apo-MD-2 | :90:N    | :78:O    | 1    | 0.99 | 0.98 |
|          | :78:O    | :90:N    | 1    | 0.98 | 0.95 |
|          | :122:OE1 | :90:NH2  | 0    | 0    | 0.21 |
|          | :122:OE2 | :90:NH2  | 0    | 0    | 0.18 |
|          | :122:OE1 | :90:NH1  | 0    | 0    | 0.17 |
|          | :122:OE2 | :90:NH1  | 0    | 0    | 0.15 |
| lip-MD-2 | :78:O    | :90:N    | 1    | N/A  | N/A  |
|          | :90:N    | :78:O    | 0.99 | N/A  | N/A  |
| 1-MD-2   | :90:N    | :78:O    | 1    | 0.99 | 0.99 |
|          | :78:O    | :90:N    | 1    | 0.80 | 0.93 |
| 2-MD-2   | :90:N    | :78:O    | 1    | 0.99 | 1    |
|          | :78:O    | :90:N    | 0.98 | 0.98 | 0.97 |
|          | :122:OE2 | :90:NH1  | 0    | 0.25 | 0    |
|          | :122:OE1 | :90:NH1  | 0    | 0.22 | 0.22 |
|          | :122:OE1 | :90:NH2  | 0    | 0.17 | 0.17 |
|          | :122:OE2 | :90:NH2  | 0    | 0.16 | 0.23 |
| 3-MD-2   | :90:N    | :78:O    | 1    | 1    | 1    |
|          | :78:O    | :90:N    | 1    | 0.97 | 0.86 |
|          | :122:OE2 | :90:NH1  | 0    | 0.40 | 0    |
|          | :122:OE2 | :90:NH2  | 0    | 0.38 | 0.19 |
|          | :122:OE1 | :90:NH1  | 0    | 0.26 | 0    |
|          | :122:OE1 | :90:NH2  | 0    | 0.21 | 0.26 |
| 4-MD-2   | :90:N    | :78:O    | 1    | 1    | 0.95 |
|          | :78:O    | :90:N    | 0.99 | 0.98 | 0.92 |
|          | :122:OE2 | :90:NH2  | 0    | 0    | 0.27 |
|          | :122:OE2 | :90:NH1  | 0    | 0    | 0.27 |
|          | :122:OE1 | :90:NH2  | 0    | 0    | 0.18 |
|          | :122:OE1 | :90:NH1  | 0    | 0    | 0.18 |
| 5-MD-2   | :78:O    | :90:N    | 0.97 | 0.79 | 0    |
|          | :90:N    | :78:O    | 0.88 | 0.83 | 0    |
|          | :122:OE1 | :90:NH1  | 0    | 0.18 | 0.62 |
|          | :122:OE2 | :90:NH2  | 0    | 0.14 | 0.66 |
|          | :122:OE1 | :90:NH2  | 0    | 0.10 | 0.61 |
|          | :122:OE2 | :90:NH1  | 0    | 0.12 | 0.55 |

Hydrogen bonds were determined by the criteria of  $\leq 3.5$  Å between donor and acceptor and  $\geq 120^\circ$  angle between donor-H-acceptor.

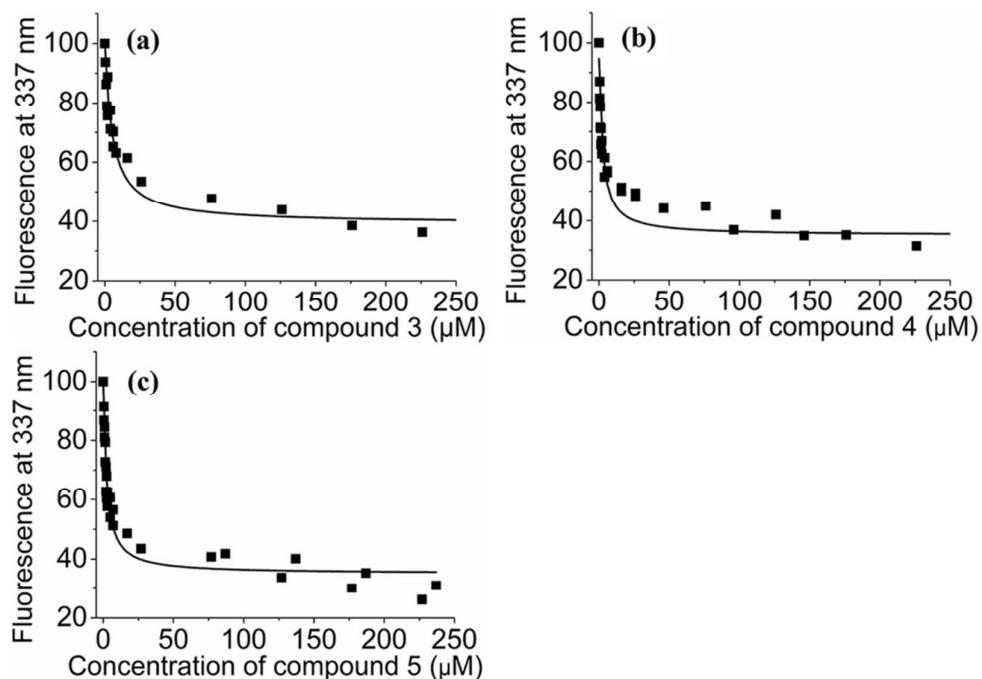

**Figure S1.** Titration curves of **3** (a), **4** (b) and **5** (c) binding to MD-2. 295 nm was chosen as the excitation of MD-2 intrinsic Trp fluorescence and emission at 337 nm (peak position) was plotted against the titrated compound concentration. By fitting the curves by nonlinear least-square regression, the  $K_d$  of  $5.0 \pm 0.8 \mu\text{M}$  (**3**),  $2.3 \pm 0.6 \mu\text{M}$  (**4**) and  $2.1 \pm 0.3 \mu\text{M}$  (**5**) are obtained. It should be noted that the titration of (+)-N-methylnaltrexone (**6**) with MD-2 binding was also performed similarly. The titration of **6** is far away from reaching a stable plateau phase, which prevents the quantitatively fitting of dissociation constant ( $> 40 \mu\text{M}$ ) of **6** binding to MD-2.

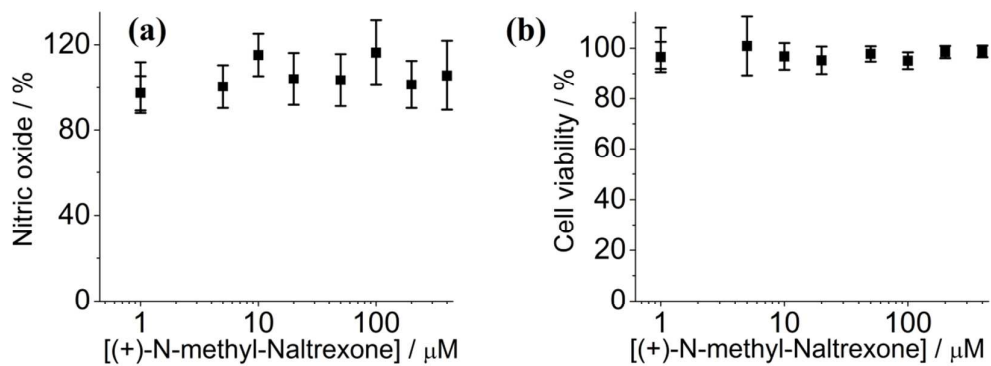

**Figure S2.** TLR4 antagonist activity and cellular toxicity of (+)-N-methylnaltrexone (**6**). **6** has no TLR4 antagonist activity ( $IC_{50} > 400 \mu M$ ). **6** did not inhibit LPS induced TLR4 signaling nitric oxide (NO) production (a), and showed no apparent cellular toxicity (b). Cellular viability was determined by crystal violet staining method.

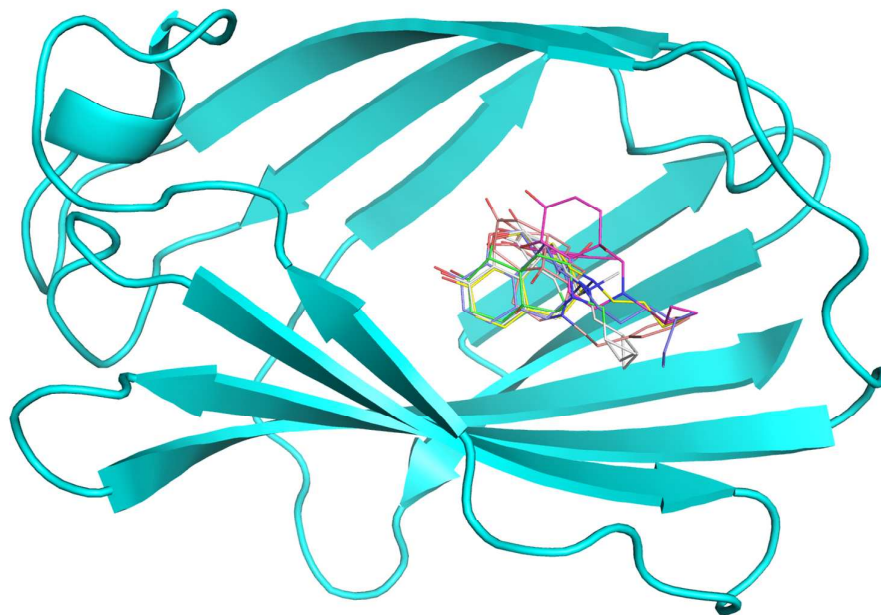

**Figure S3.** The best docking poses of **1** (green), **2** (yellow), **3** (salmon), **4** (cyan), **5** (magenta) and **6** (grey). Ligands are shown as lines and MD-2 is shown as cartoon

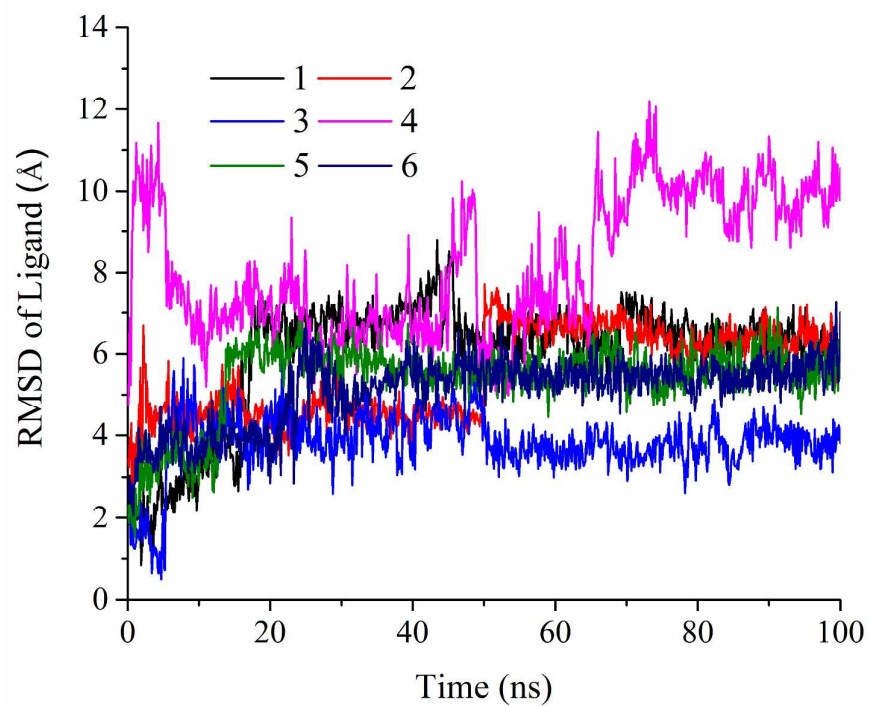

**Figure S4.** Time evolution of ligand RMSD. Black, red, blue, magenta, dark green and navy indicate MD-2 in the complex with **1**, **2**, **3**, **4**, **5** and **6** respectively.

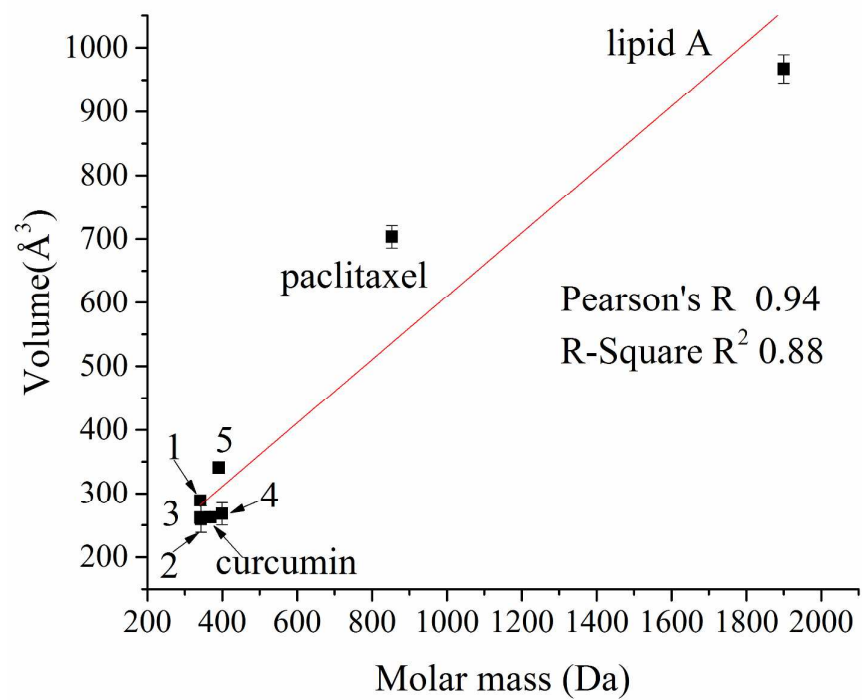

**Figure S5.** Correlation of the MD-2 cavity volume with the molar mass of the ligands.



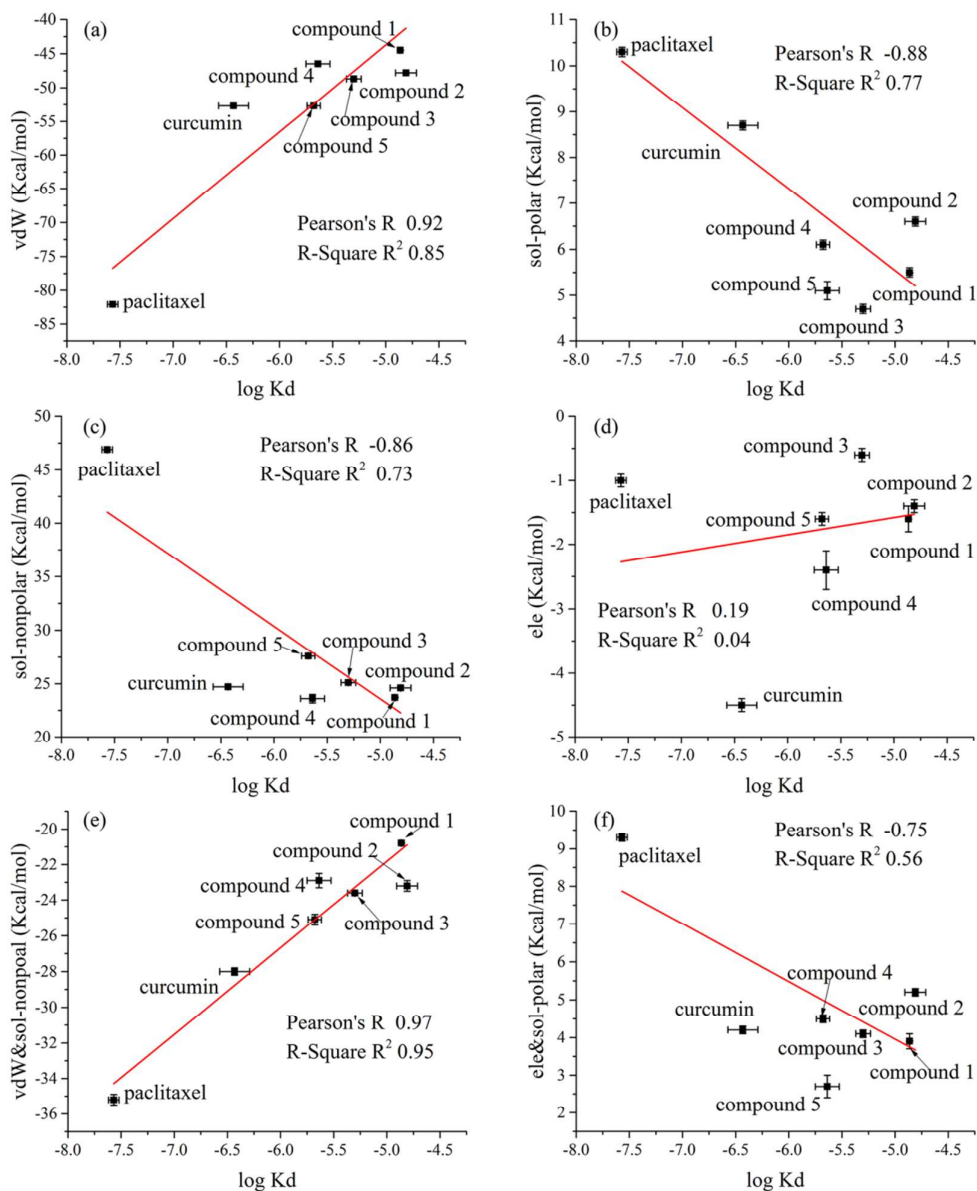

**Figure S6.** Correlation of the logarithm of experimentally determined dissociation constants  $\log K_d$  with the decomposition of binding free energies: (a) van der Waals interactions (vdW) versus  $\log K_d$ ; (b) polar solvation free energy (sol-polar) versus  $\log K_d$ ; (c) non-polar solvation free energy (sol-nonpolar) versus  $\log K_d$ ; (d) electrostatic interactions (ele) versus  $\log K_d$ ; (e) van der Waals interactions and the non-polar solvation free energy (vdW & sol-nonpolar) versus  $\log K_d$ ; (f) electrostatic interactions and polar solvation free energy (ele & sol-polar) versus  $\log K_d$ .

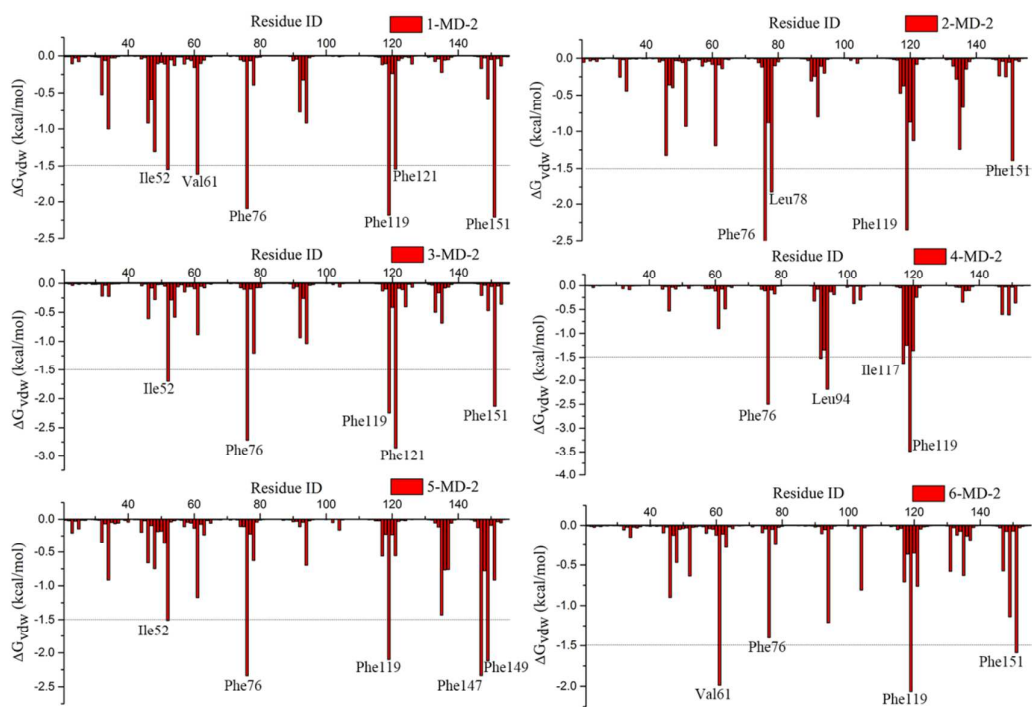

**Figure S7.** Analysis of the van der Waals contribution of each residue in binding free energy. Residues with  $\Delta G_{vdw} > 1.5$  Kcal/mol are labeled.

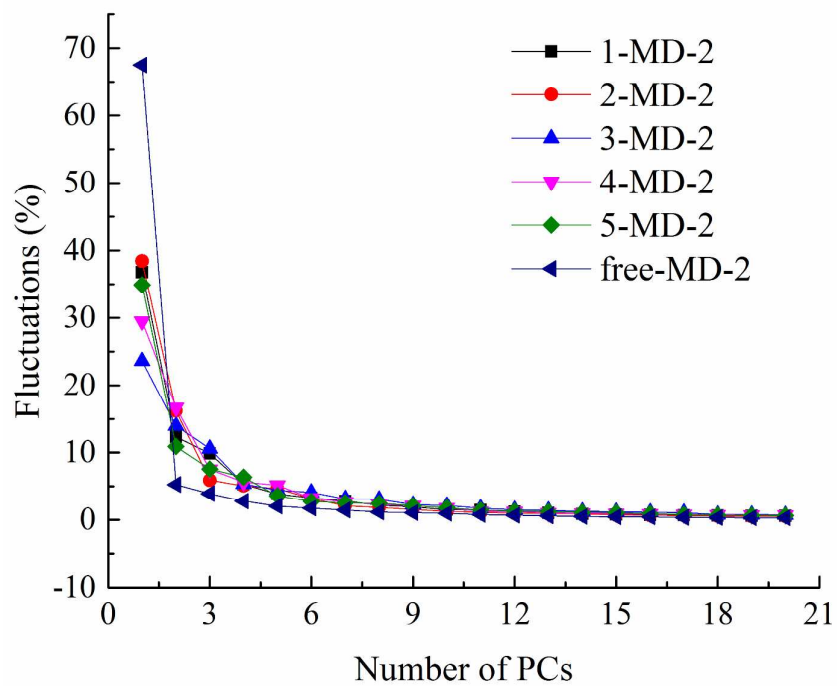

**Figure S8.** Percentages of fluctuations captured by Cartesian-coordinate PCs for all systems. Black, red, blue, magenta, dark green and navy indicate MD-2 in the complex with **1**, **2**, **3**, **4**, **5** and **6** respectively.

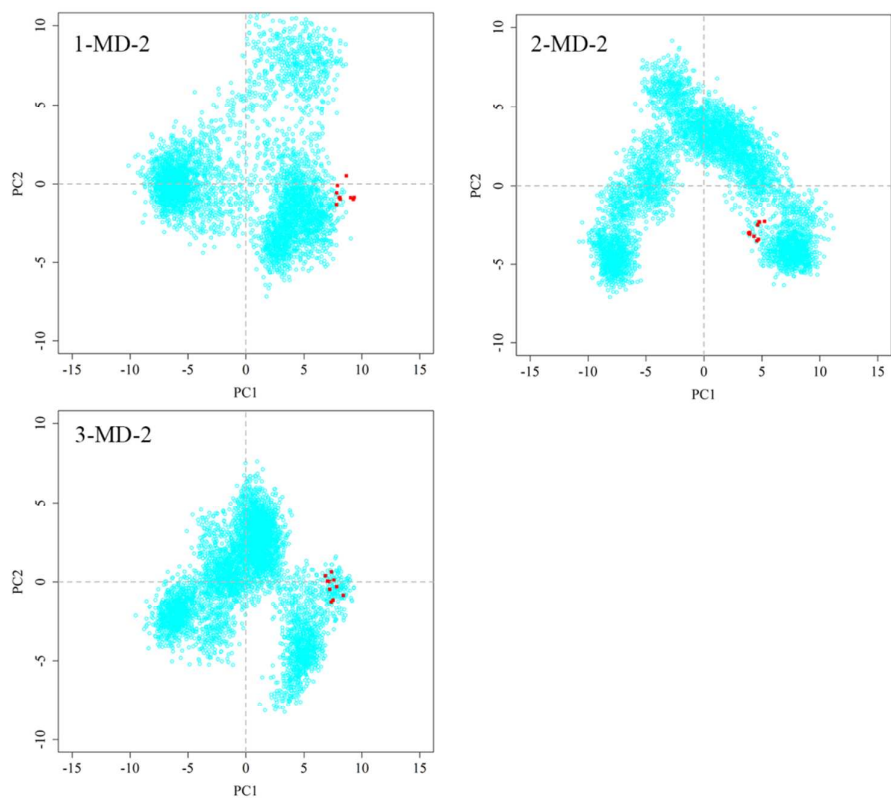

**Figure S9.** PCA analysis of **1-MD-2**, **2-MD-2** and **3-MD-2**. Ten crystallographic MD-2 structures are colored red while the distribution of MD conformers is depicted with cyan points.

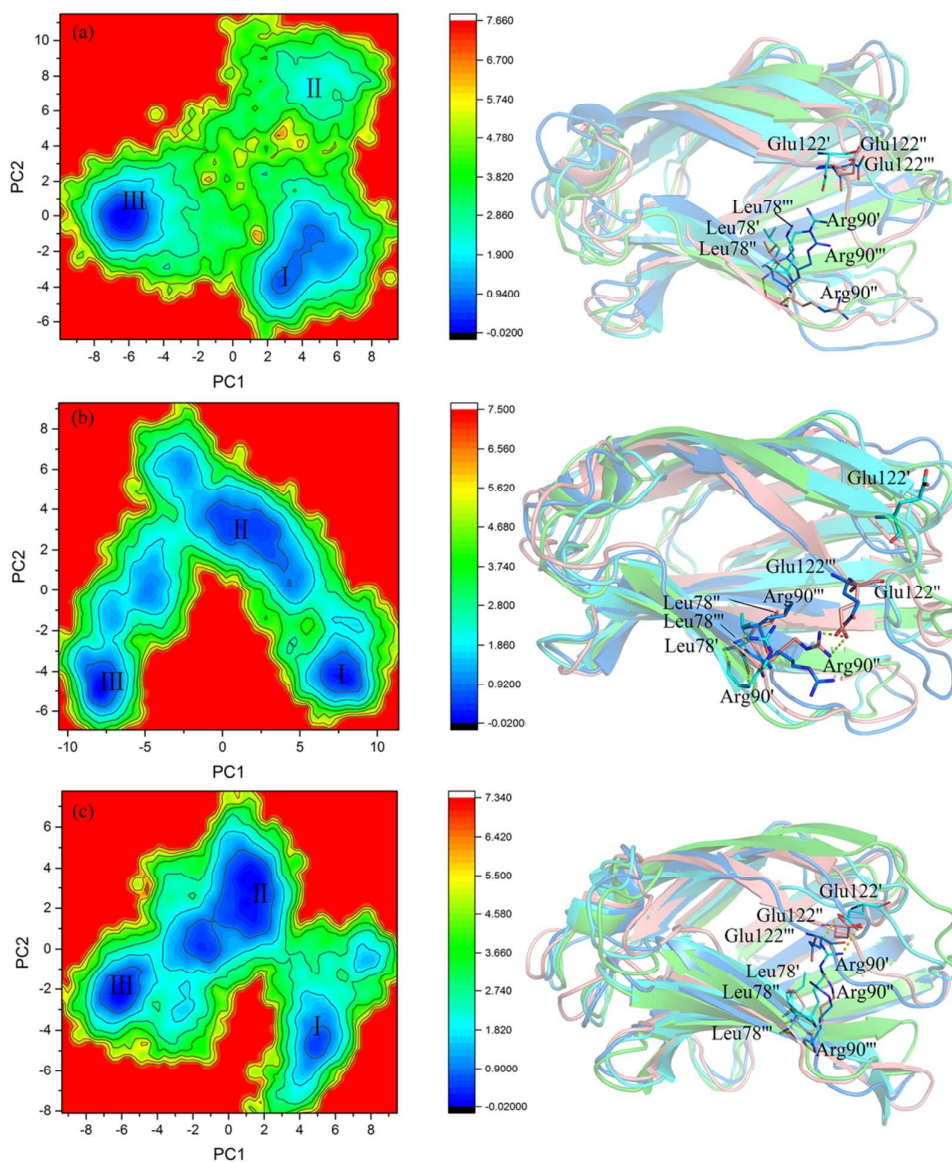

**Figure S10.** FEL analysis of MD trajectories of **1-MD-2** (a), **2-MD-2** (b) and **3-MD-2** (c). The representative MD-2 structures corresponding to each FEL state are also shown. State I: cyan color; State II, salmon color; State III, marine color. Key residues involving hydrogen bond interactions at the mouth of MD-2 cavity are shown as stick. Free energy values are given in kcal/mol as indicated by the color bars.

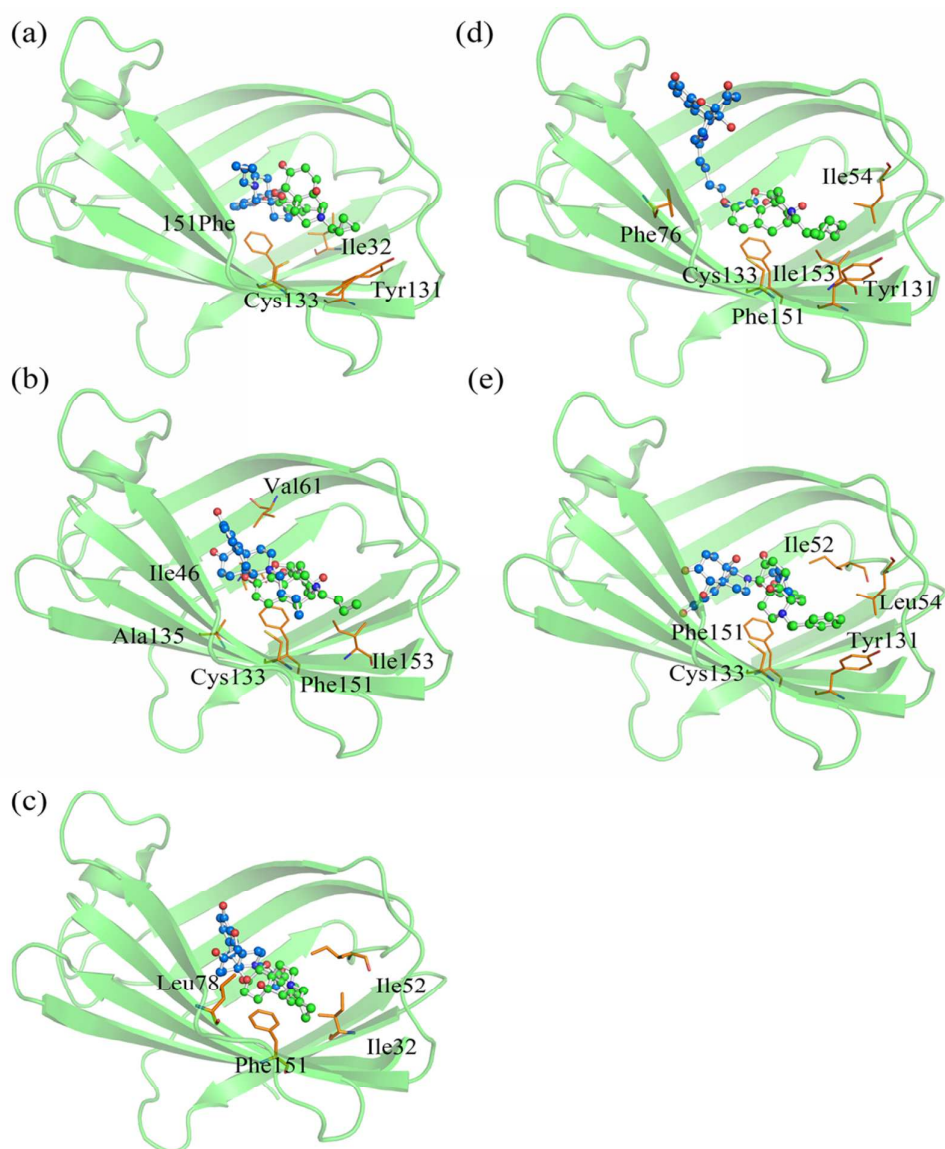

**Figure S11.** Alignments of the best docking poses (green ball and stick) and the poses in the representative MD-2 binding structure with the lowest-energy (navy ball and stick) of **1** (a), **2** (b), **3** (c), **4** (d) and **5** (e). The green cartoon represented the initial MD-2 structures.
